# Supplementary material for: Pescoids and Chimeras to Probe Early Evo-Devo in the Fish Astyanax mexicanus
Source: Frontiers journal article supplement (doi:10.3389/fcell.2021.667296), 2021-04-13
Supplement: Data_Sheet_1.PDF [file Data_Sheet_1.PDF]

## Supplementary Material

### Supplementary Figures

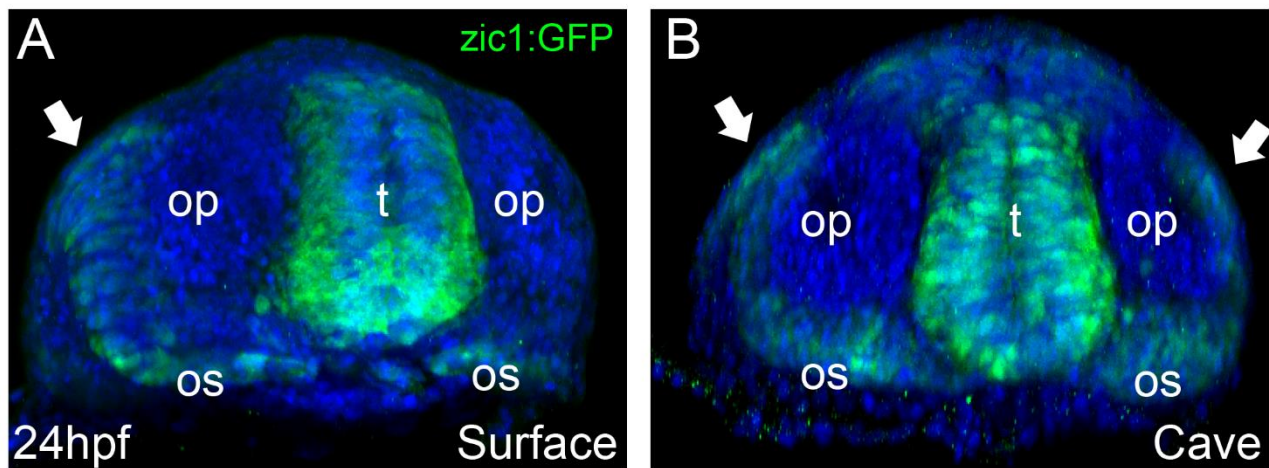

**Supplementary Figure 1. GFP expression in the forebrain of transgenic embryos *zic1:GFP*.** 3D confocal reconstructions from Surface and Cavefish *zic1:GFP* transgenic embryos (**A** and **B**, respectively) at 24hpf. Images in frontal view. Arrows indicate the embryonic eyes; op, olfactory placodes; os, optic stalks; t, telencephalon.

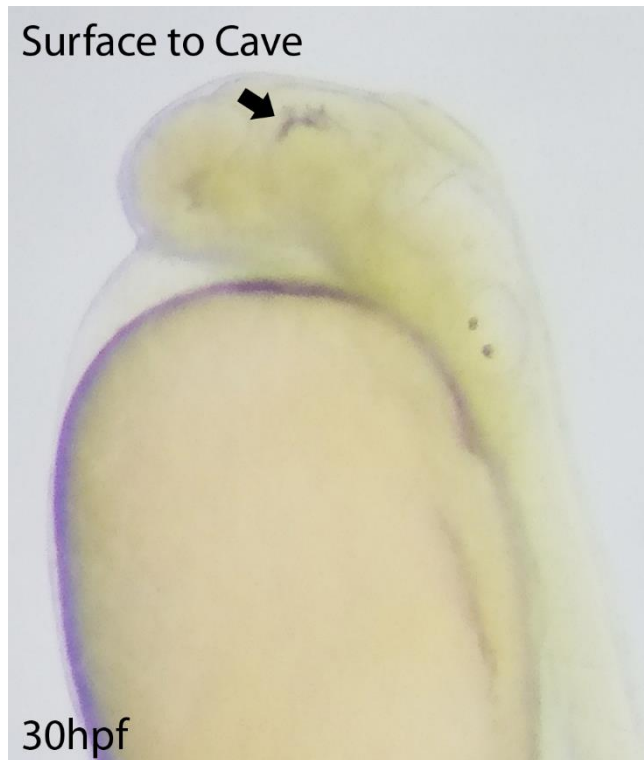

**Supplementary Figure 2. Differentiation of pigmented cells in chimeric embryo.** Pigmented cell (arrow) derived from surface fish donor cells transplanted into a cavefish embryo at the blastula stage.
